# Supplementary material for: Identification of a distinct luminal subgroup diagnosing and stratifying early stage prostate cancer by tissue-based single-cell RNA sequencing
Source: PubMed Central journal article supplement (PMC7545561; doi:10.1186/s12943-020-01264-9), 2020-10-08
Supplement: 12943_2020_1264_MOESM1_ESM.pdf [file 12943_2020_1264_MOESM1_ESM.pdf]

**Supplementary Fig. 1**

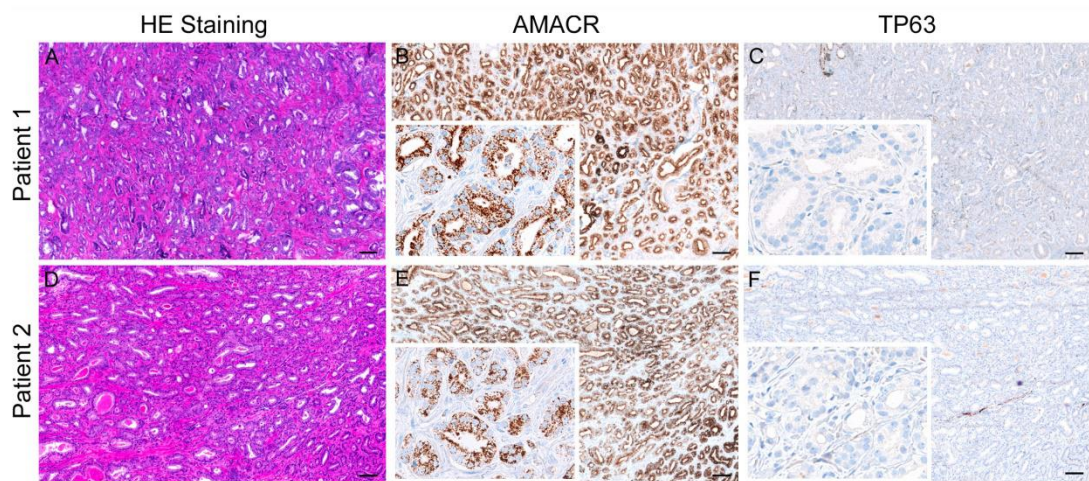

**PCa pathology grading diagnosis by histology observation and the expression of AMACR and TP63. A, D HE staining of PCa tissues. B, E Immunostaining of AMACR on PCa tissues. C, F Immunostaining of TP63 on PCa tissues. Bar = 50 µm.**

## Supplementary Fig. 2

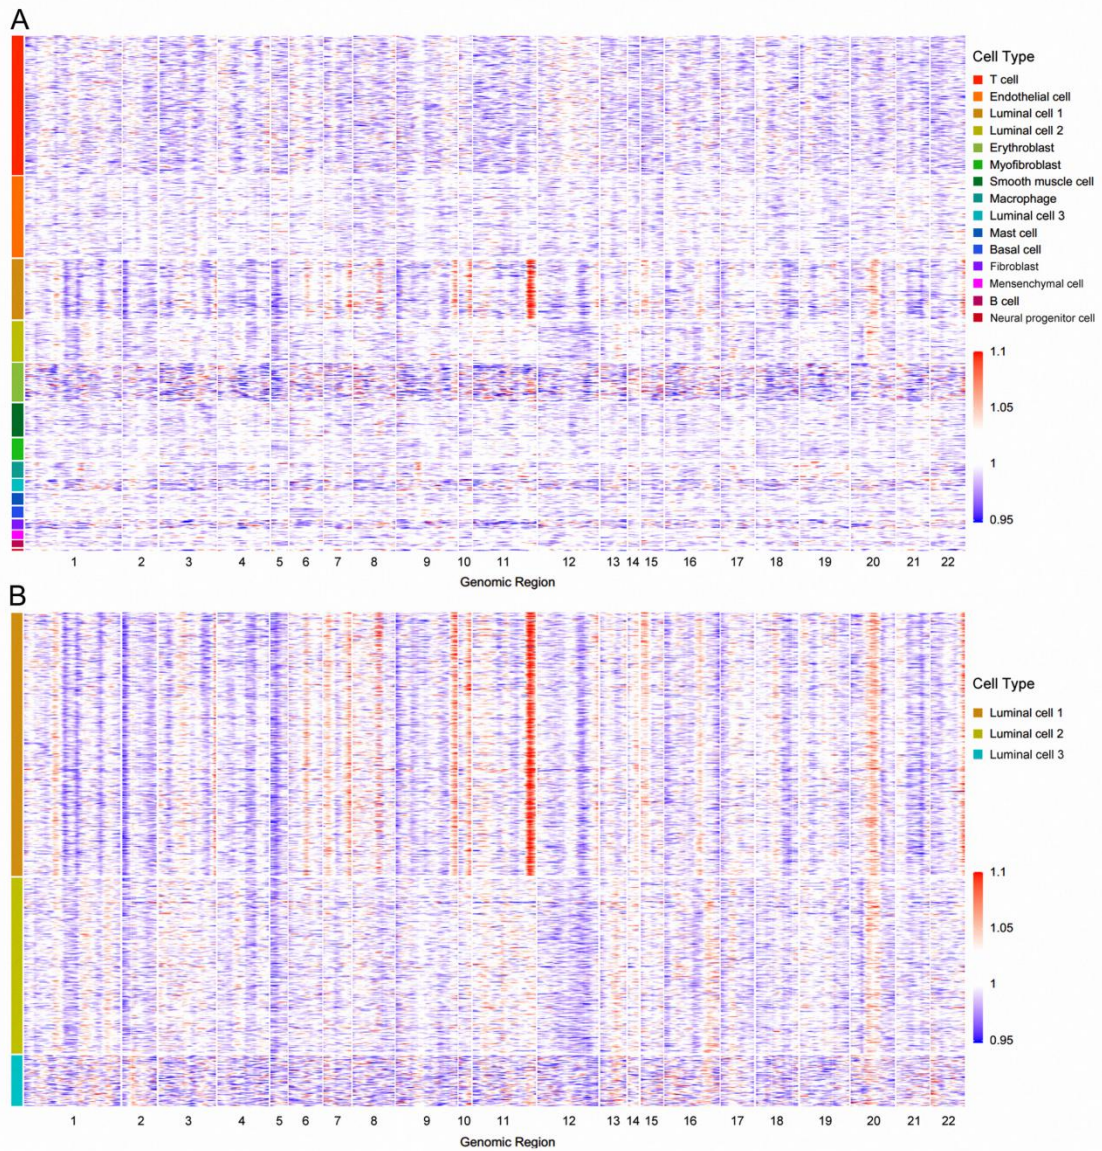

**CNV analysis of different type of cells in PCa tissues. A** All clusters in PCa tissues; **B** Three types of luminal clusters in PCa tissues.

### Supplementary Fig. 3

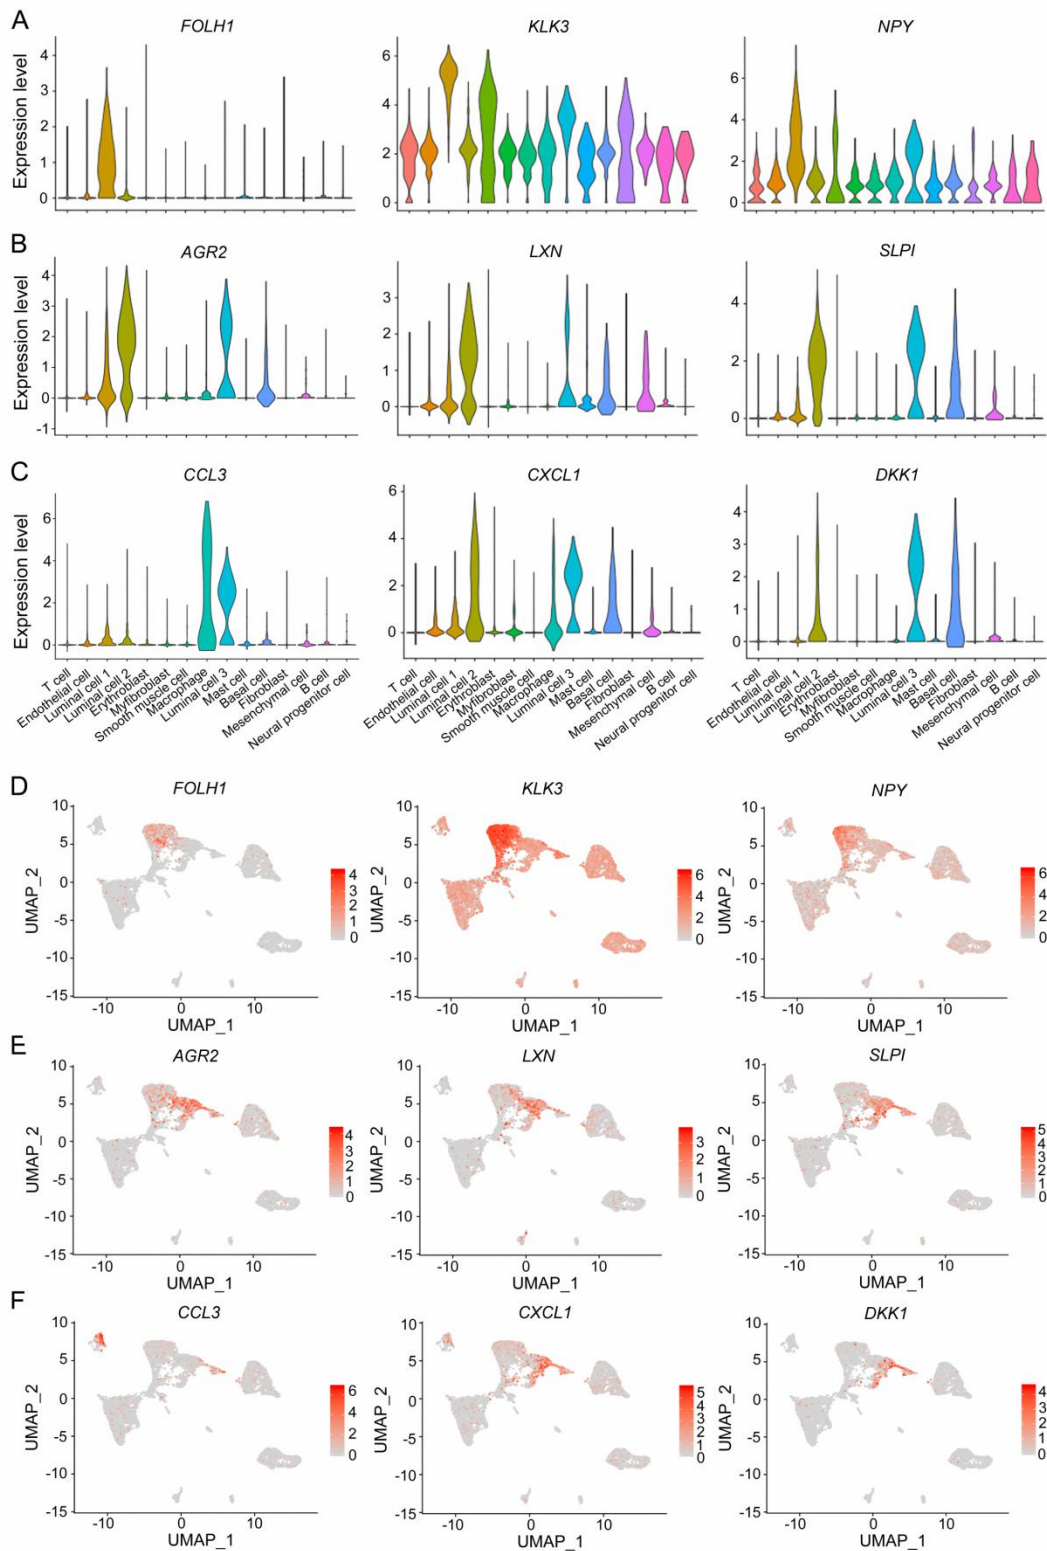

**Highly expressed genes distributed in Pca.** **A-C** Violin plots displaying the expression of highly expressed genes in each luminal cluster across the cell types identified in Pca (from luminal 1 to luminal 3, respectively); **D-F** Expression levels of highly expressed genes in each luminal cluster plotted onto the UMAP (from luminal 1 to luminal 3, respectively), color key from gray to red indicates relative expression levels from low to high.



**Supplementary Fig. 4**

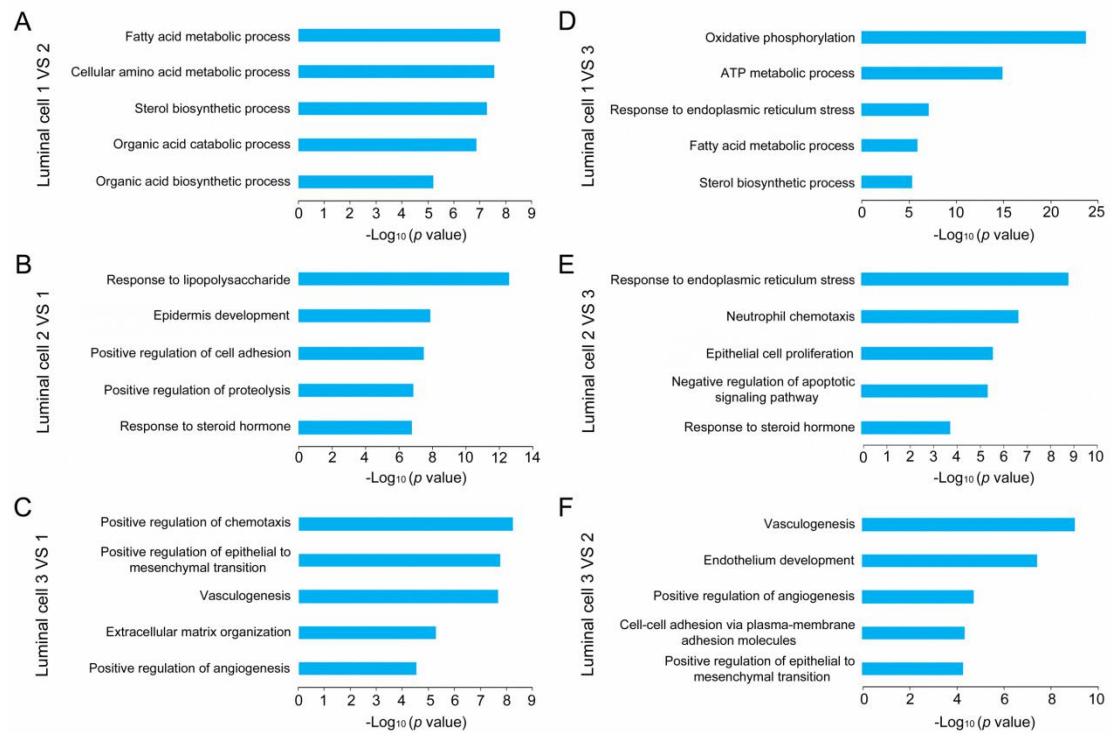

**GO enrichment of differentially expressed genes (DEGs) of each luminal cluster analyzed by pairwise comparison. A, B** The enriched GO terms for DEGs between type 1 and type 2 luminal cells; **C, D** The enriched GO terms for DEGs between type 1 and type 3 luminal cells; **E, F** The enriched GO terms for DEGs between type 2 and type 3 luminal cells.

**Supplementary Fig. 5**

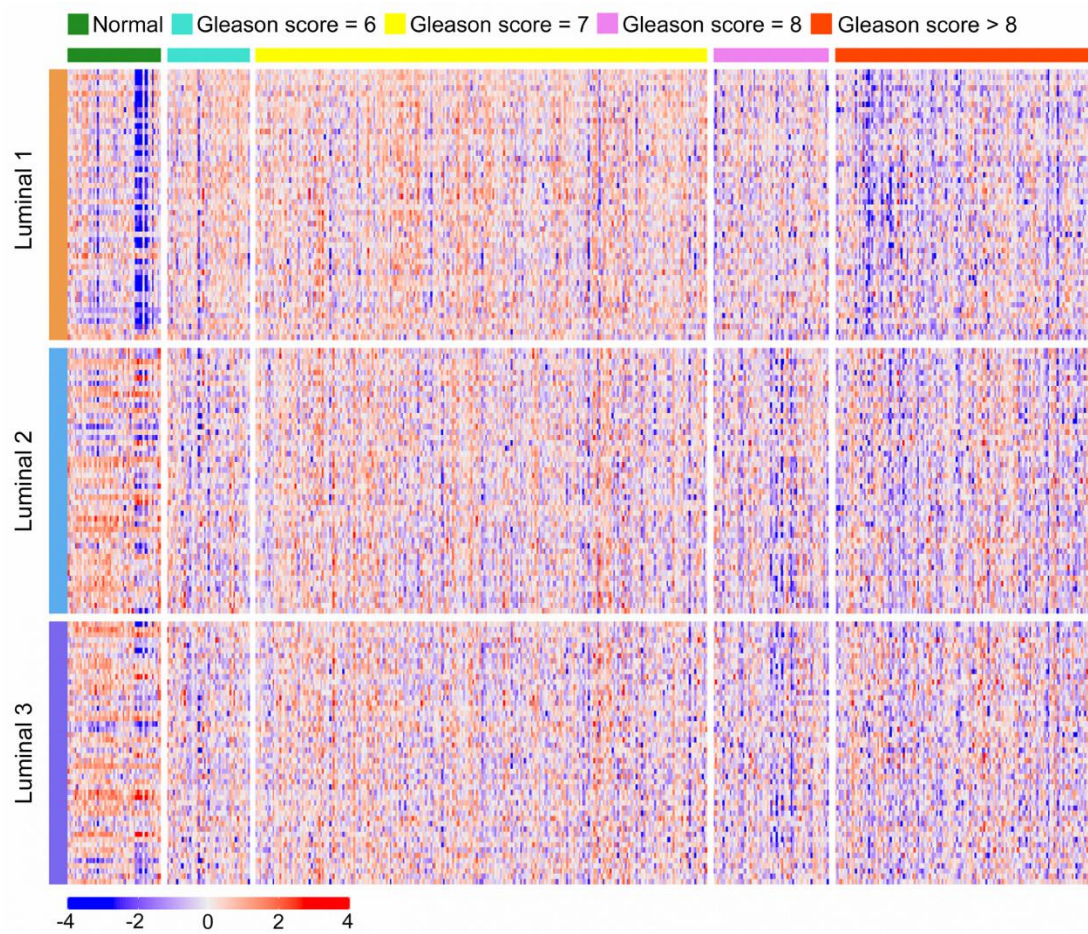

**Clustering heatmap demonstrating the correlation between PCa status and the marker gene expression of each luminal cluster using TCGA data.**



**Supplementary Fig. 6**

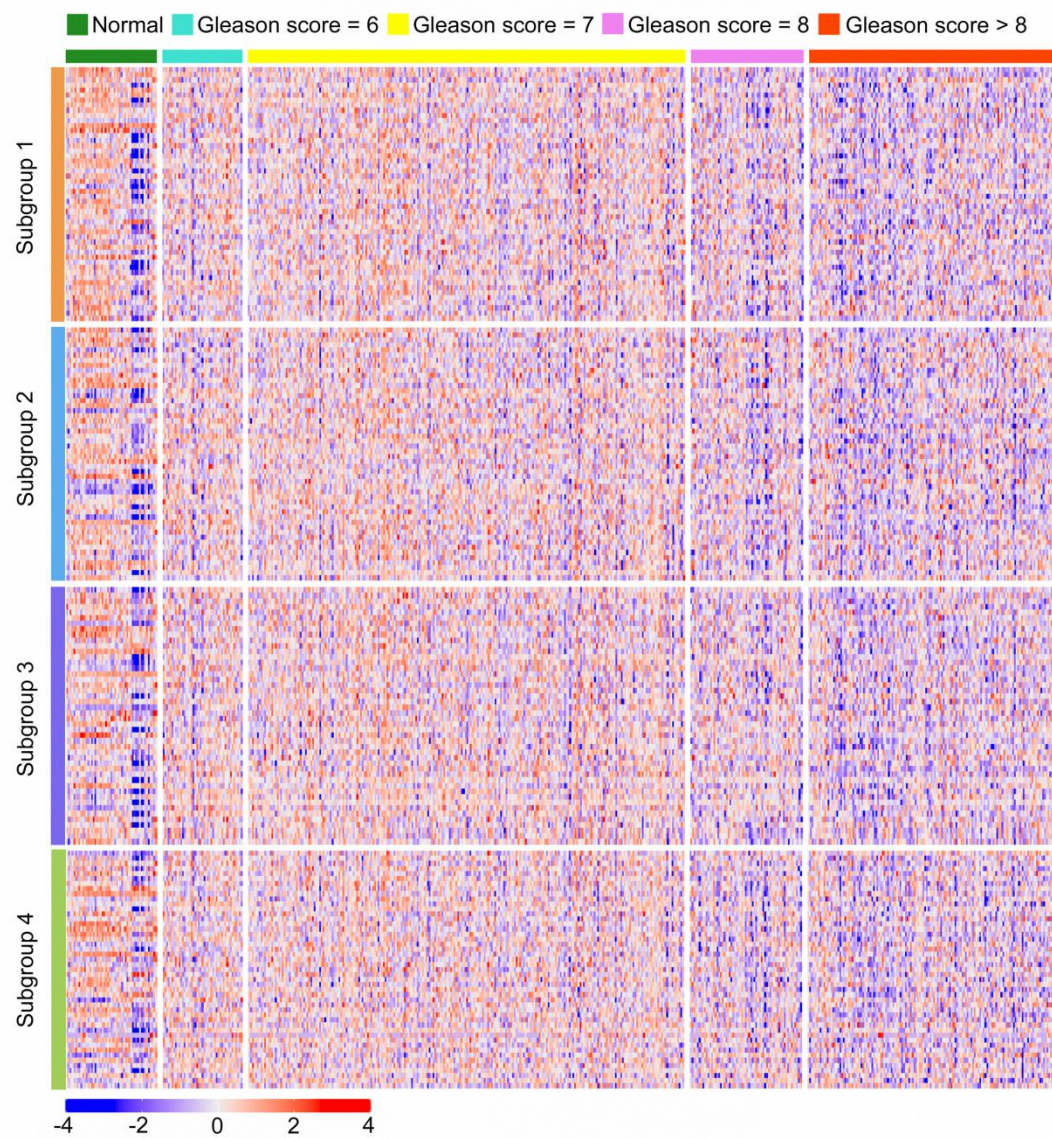

**Clustering heatmap demonstrating the correlation between PCa status and the marker gene expression of subgroup 1-4 using TCGA data.**

**Supplementary Fig. 7**

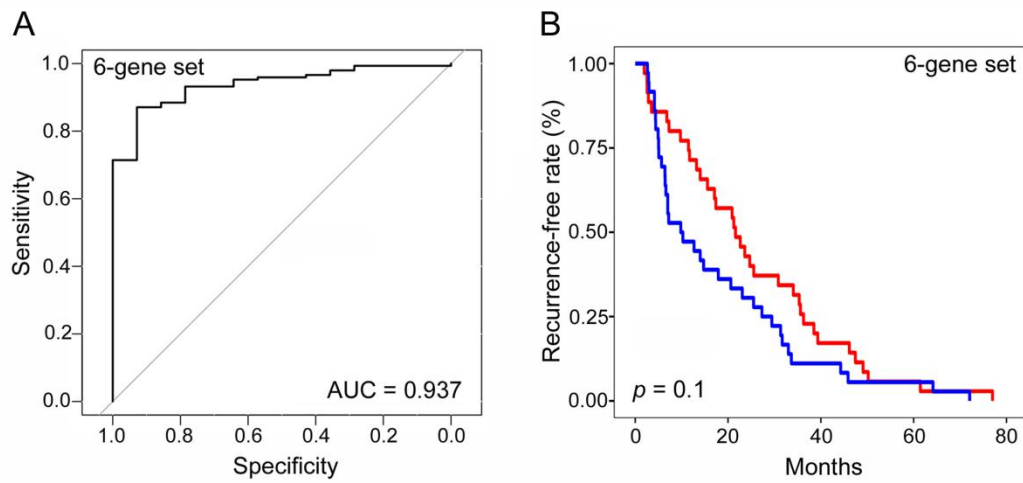

**Clinical correlations of 6-gene set from subgroup 5 marker genes were analyzed with their expression patterns in PCa patients from TCGA. A ROC analysis for 6-gene set from subgroup 5 marker genes in distinguishing normal prostate from cancerous prostate; B Kaplan-Meier analysis predicting recurrence-free rate of PCa patients based on the expression changes of 6-gene set from subgroup 5 marker genes.**

**Supplementary Fig. 8**

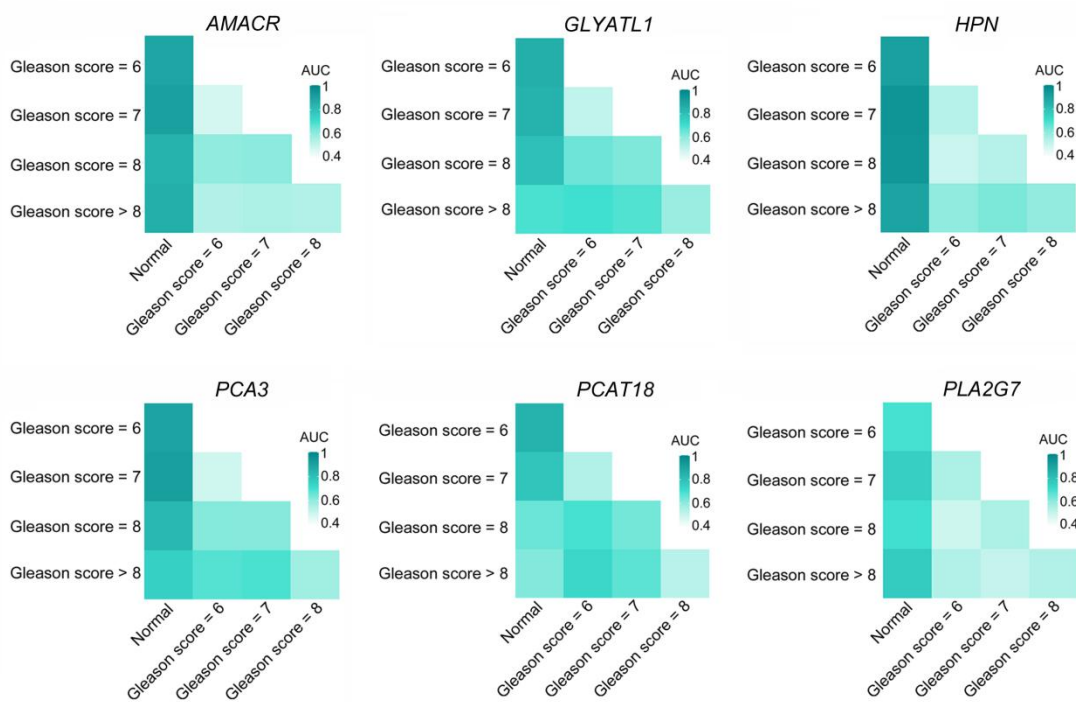

**Heatmap showing different distinguishing abilities of subgroup 5 marker genes in patients with various pathology gradings.**



**Supplementary Fig. 9**

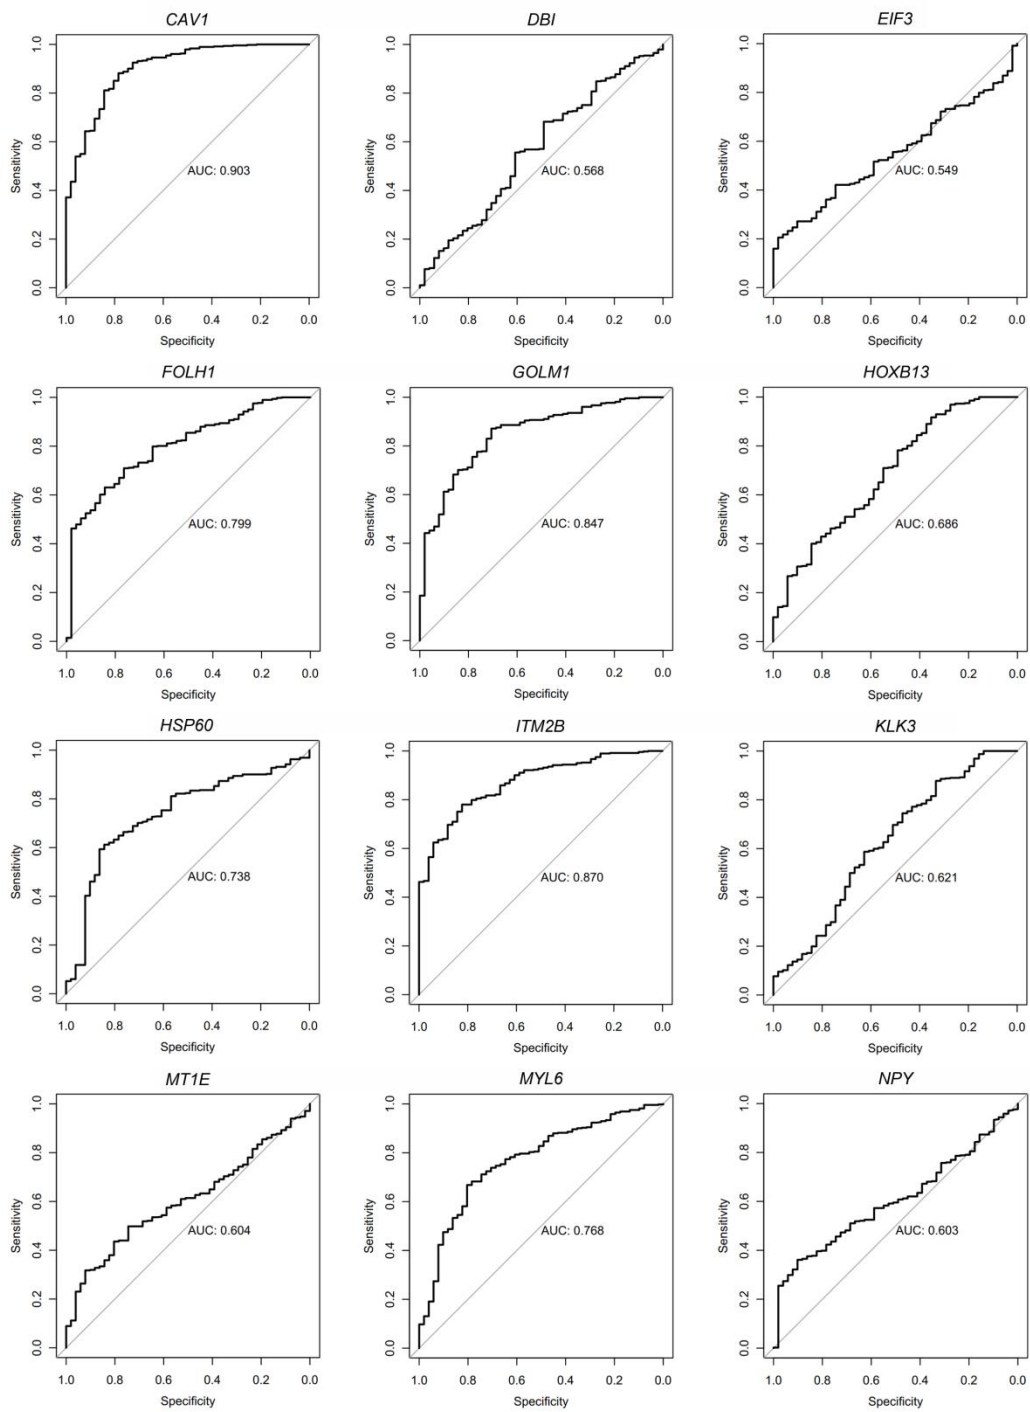

**ROC analysis of reported candidate marker genes for PCa diagnosis.**
